# Supplementary material
Source: Springer Nature journal article supplement (https://www.springermedizin.de/resource/supplementary/12943_2013_1242_MOESM4_ESM.pdf/9553078)

**A)** Hypoxia vs Normoxia significantly up-regulated microRNAs

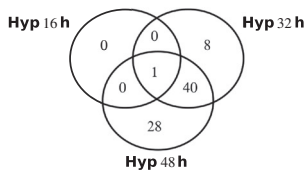

Hypoxia vs Normoxia significantly down-regulated microRNAs

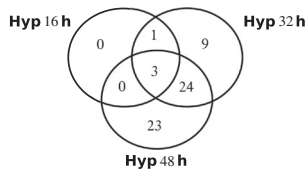

**B)**

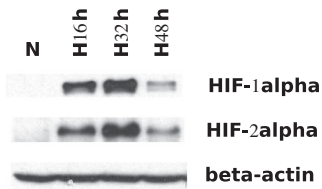

**C)**

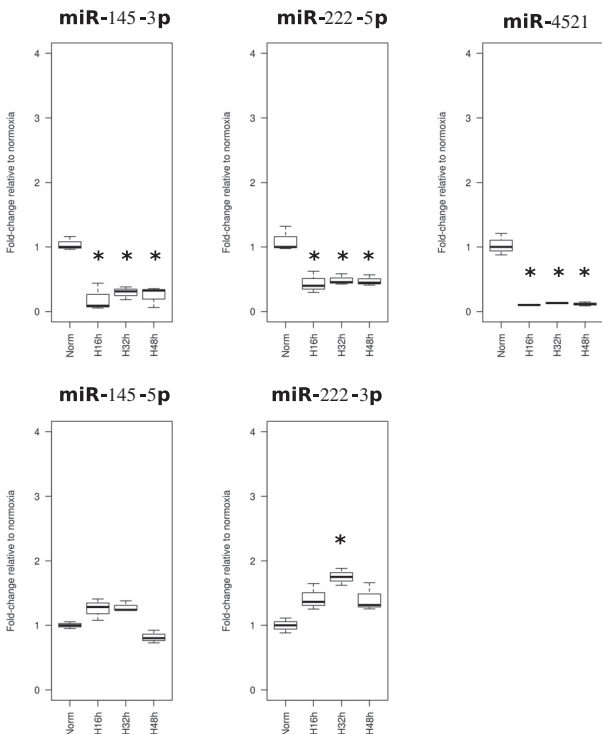

Supplement: MOESM4 [file 9553078]
